# Supplementary material for: Solid phosphorus carbide?
Source: Royal Society of Chemistry journal article supplement (doi:10.1039/b207743b), 2002-01-01
Supplement: b207743b.doc [file b207743b.doc]

# **Supplementary data**

CASTEP calculations: We used an energy cutoff for the plane waves of 310 eV, and 108, 108, 72, 32, 108, 38, 63, 54 *k*-points (generated according to the Monkhorst-Pack schemeError: Reference source not found) for structures with space groups 215, 111, 147, 159, 160, 187, 220 and 25 respectively.

SIESTA calculations: We used a split-valence double- basis set including a set of polarization 3d functions for both carbon and phosphorus atoms, as obtained with an energy shift of 250 meV. In order to obtain the Hamiltonian matrix elements, the electron integrals of the self-consistent terms are computed with the help of a regular space grid in which the electron density is projected. The grid spacing is determined by the maximum kinetic energy of the plane waves that can be represented in that grid. In our calculations, a cutoff of 225 Ry is used, which corresponds to a spacing between grid points of around 0.11 Å (for the pseudocubic phase). For the pseudocubic phase, the Brillouin zone (BZ) was sampled using a (777) grid, corresponding to 196 k-points.[[1]](#endnote-2) The cell parameters and atomic positions were relaxed and optimised by energy minimization using a conjugate-gradient algorithm with a maximum force tolerance and maximum stress component of 0.02 eV/Å and 0.5 GPa respectively.

**Structure key**

*Space Group* *Name*

159 Alpha

147 Beta

220 Cubic

215 Pseudocubic (defect zinc blende)

186 Defect wurtzite

187 ‘Graphitic’ (hexagonal - stacking of layers AB – intralayer vacancy

ordering as in Fig. 2a)

160 ‘Graphitic’ (stacking of layers ABC – intralayer vacancy ordering as in

Fig. 2a)

25 ‘Graphitic’ (orthorhombic – intralayer vacancy ordering as in

Fig. 2b)

3 ‘Graphitic’ (see text – lower symmetry form with same intralayer

vacancy ordering as orthorhombic)

**CASTEP CALCULATIONS:**

| Point group | **P31*c* (159)** | **(147)** | **I*d* (220)** | **P*m* (215)** | **P63*mc* (186)** |
| --- | --- | --- | --- | --- | --- |
| Volume (Å3) | 83.61 | 78.89 | 76.12 | 70.45 | 71.37 |
| Energy (eV/formula unit) | -1188.02 | -1187.53 | -1186.21 | -1189.41 | -1189.18 |
| *a* | 8.187 | 7.699 | 6.738 | 4.130 | 5.803 |
| *b* | 8.187 | 7.696 | 6.738 | 4.130 | 5.803 |
| *c* | 5.762 | 3.075 | 6.738 | 4.130 | 4.872 |
|  |  |  |  |  |  |
| C | (0.356,0.894,0.686) | (-0.399,-0194,0.246) | (0.750,-0.125,0.500) | (0.500,0.000,0.500) | (0.672,0.836,0.044) |
| C | (0.920,0.759,0.527) |  |  |  |  |
| P | (0.000,0.000,0.468) | (-0.333,0.333,0.446) | (0.255,0.245,-0.245) | (-0.224,0.224,-0.224) | (0.333,0.667,0.885) |
| P | (0.667,0.333,0.111) | (-0.052,0.348,-0.230) |  |  | (0.815,0.630,0.927) |
| P | (0.328,0.004,0.433) |  |  |  |  |
| P | (0.912,0.654,0.813) |  |  |  |  |
|  |  |  |  |  |  |
| Point group | **P*m*2 (187)** | **R3*m* (160)** | **P112 (3)a** | **P112 (3)b** | **P*mm*2 (25)** |
| Volume (Å 3) | 102.14 | 90.46 | 96.99 | 92.77 | 103.58 |
| Energy (eV/formula unit) | -1188.24 | -1187.90 | -1188.27 | -1188.68 | -1187.95 |
| *a* | 5.765 | 5.810 | 3.857 | 4.038 | 3.619 |
| *b* | 5.765 | 5.810 | 5.687 | 5.705 | 5.708 |
| *c* | 7.111 | 9.284 | 5.105 | 5.136 | 5.015 |
| ** |  |  | 120.0 | 130.5 | 90 |
|  |  |  |  |  |  |
| C | (-0.162,-0.356,0.000) | (0.163,0.326,0.351) | (0.000,0.500,0.366) | (0.000,0.500,0.379) | (0.000,0.500,0.385) |
| C | (0.481,-0.013,0.500) | (0.000,0.000,-0.272) | (0.000,0.250,0.916) | (0.016,-0.244,0.864) | (0.000,-0.246,0.870) |
| P | (0.013,-0.012,0.000) | (0.154,0.307,0.004) | (0.000,0.000,0.000) | (0.000,0.000,0.056) | (0.000,0.000,0.080) |
| P | (-0.343,0.343,0.500) |  | (0.000,0.500,0.000) | (0.000,0.500,0.045) | (0.000,0.500,0.044) |
| P | (0.133,-0.134,0.500) |  | (0.000,0.750,0.550) | (-0.140,-0.824,0.536) | (0.000,-0.786,0.524) |
| P | (0.056,0.508,0.000) |  |  |  |  |

Symmetry labels refer to the symmetry constraints applied in each calculation, and thus the symmetries of the final optimized structures. Note, as referred to in the text, removing the symmetry constraints in calculations on structures with space groups 159 (alpha), 147 (beta) and 220 (cubic) lead to very highly distorted symmetry broken structures which are high in energy and the details of which not shown here. Removing symmetry constraints in calculations on the remaining structures had no effect.

a ** fixed at 120°

b ** optimized

**SIESTA CALCULATIONS:**

| Point group | **P*m*2 (187)** | **R3*m* (160)** | **P112 (3)** | **P*m* (215)** | **P63*mc* (186)** |
| --- | --- | --- | --- | --- | --- |
| Volume (Å 3) | 104.08 | 96.33 | 96.76 | 76.30 | 76.95 |
| Energy (eV/formula unit) | -1175.57 | -1175.67 | -1176.24 | -1177.43 | -1177.09 |
| *a* | 5.930 | 5.934 | 4.069 | 4.241 | 5.959 |
| *b* | 5.930 | 5.934 | 5.890 | 4.241 | 5.959 |
| *c* | 6.834 | 9.476 | 5.259 | 4.241 | 5.005 |
| ** |  |  | 129.90 |  |  |
|  |  |  |  |  |  |
| C | (-0.174,-0.347,0.000) | (-0.324,-0.162,-0.674) | (0.000,0.500,0.341) | (0.500.0.000,0.500) | (0.673,0.837,0.046) |
| C | (0.493,-0.014,0.500) |  | (-0.008,0.247,0.823) |  |  |
| P | (0.000,0.000,0.000) | (0.365,0.182,-0.674) | (0.000,0.000,0.013) | (0.225,0.225,0.225) | (0.333,0.667,0.890) |
| P | (-0.333,0.333,0.500) | (0.000,0.000,-0.289) | (0.000,0.5000,0.003) |  | (0.816,0.631,0.926), |
| P | (0.147,-0.147,0.500) |  | (0.120,0.819,0.491) |  |  |
| P | (0.041,0.520,0.000) |  |  |  |  |

Note symmetry constraints cannot be applied in SIESTA calculations. Space group labels refer to the symmetries of the final optimized structures.

**Reference**

1. H.J. Monkhorst and J.D. Pack, *Phys. Rev. B* 1976, **13**, 5188. [↑](#endnote-ref-2)
